# Supplementary material
Source: PubMed Central journal article supplement (PMC356947)
Supplement: pnas_0400073101_4.pdf [file pnas_0400073101_4.pdf]

mPkhd1 1 **MM**LAWLVSLLSMEVLLLAKPYS**S**FQIEPA**EG**SLAGGTWITV**FDGL**DRS**I**LYPNNGSQ**I**Q  
 hPKHD1 1 **-M**LAWLVSLLSMEVLLLAVRHL**S**LHIEPE**EG**SLAGGTWITV**FDGL**ELG**V**LYPNNGSQ**L**E

mPkhd1 61 **LD**LVSA**I**PT**--LR-**PCDVS**E**AFV**DL**PVVTC**Q**TRSL**P**SEADAG**P**V**S**LEMRS**G**EQ**V**L**G**TP  
 hPKHD1 60 **I**HLV**N**VMV**V**PALRS**V**PCD**V**EP**V**FD**L**PVVTC**R**TRSV**L**SE**A**HE**G**L**V**E**L**E**A**Y**F**GG**L**V**S**SP

mPkhd1 118 **CP**GS**L**DSCT**F**K**F**SK**D**Q**T**P**V**L**Y**Q**V**Y**P**A**S**GV**P**GE**V**V**S**V**Y**GR**V**IT**T**W**L**ET**F**DP**D**V**D**Y**I**ES**P**LI  
 hPKHD1 120 **NP**GP**R**DSCT**F**K**F**SK**A**Q**T**P**I**V**R**Q**V**Y**P**ES**G**V**P**CK**L**I**R**V**Y**GW**I**IT**G**R**L**ET**F**DF**A**E**Y**IS**P**VI

mPkhd1 178 **LE**ARE**D**K**W**L**T**PC**S**LIN**R**Q**T**G**S**C**F**PI**Q**EE**H**GL**G**N**V**Q**C**R**V**E**G**D**Y**I**G**S**Q**N**V**S**F**S**V**F**N**K**G**R**S**M**V**  
 hPKHD1 180 **LE**AQ**D**K**W**V**T**PC**S**LIN**R**Q**M**G**S**C**Y**PI**Q**ED**H**GL**G**T**I**Q**C**H**V**E**G**D**Y**I**G**S**Q**N**V**S**F**S**V**F**N**K**G**R**S**M**V**

mPkhd1 238 **H**KE**A**W**L**IS**A**K**Q**EL**F**LY**Q**T**Y**PE**I**LS**V**F**F**K**V**G**S**L**G**GR**T**D**I**I**T**G**D**FF**D**ES**A**R**V**T**I**AG**I**PC**D**I  
 hPKHD1 240 **H**KK**A**W**L**IS**A**K**Q**DL**F**LY**Q**T**H**SE**I**LS**V**F**F**ET**G**S**L**G**G**R**T**N**I**T**I**T**G**D**FF**D**N**SA**Q**V**T**IAG**I**PC**D**I

mPkhd1 298 **R**Y**V**SP**R**K**I**E**C**T**T**RAP**C**N**E**AR**L**T**A**P**Q**AG**N**R**G**L**R**FE**V**G**D**AT**K**D**V**EL**T**EAT**P**G**Y**R**W**Q**I**V**P**NAS  
 hPKHD1 300 **R**H**V**SP**R**K**I**E**C**T**T**RAP**C**K**D**V**R**L**T**T**P**Q**E**G**N**R**G**L**L**FE**V**G**D**AVE**G**EL**T**EAT**P**G**Y**R**W**Q**I**V**P**NAS

mPkhd1 358 **S**F**S**G**F**W**S**K**E**G**R**PF**R**AR**L**SG**F**F**V**AP**E**T**N**NY**T**FW**I**Q**A**D**S**Q**A**S**L**C**F**S**S**SE**E**PR**T**K**V**E**V**AS**V**GV  
 hPKHD1 360 **S**FF**G**F**W**S**Q**E**G**PF**R**AR**L**SG**F**F**V**AP**E**T**N**NY**T**FW**I**Q**A**D**S**Q**A**S**L**H**F**S**W**SE**E**PR**T**K**V**K**V**AS**I**SV

mPkhd1 418 **G**TAD**W**F**D**S**W**E**Q**IG**N**E**G**SW**H**Q**K**T**T**K**L**E**L**Q**G**G**A**K**Y**Y**L**E**A**E**Q**H**G**I**A**PS**R**G**M**R**I**G**V**Q**I**H**N**T**W**L**N**  
 hPKHD1 420 **G**TAD**W**F**D**S**W**E**Q**N**R**D**E**G**T**W**Q**Q**K**T**P**K**L**E**L**L**G**G**A**M**Y**Y**L**E**A**E**H**H**G**I**A**PS**R**G**M**R**I**G**V**Q**I**H**N**T**W**L**N**

mPkhd1 478 **P**D**V**V**N**T**Y**L**L**E**K**H**Q**I**R**A**R**A**Q**R**L**P**E**I**Q**V**L**H**V**S**G**K**G**N**F**FL**T**W**G**N**V**S**S**Q**P**V**P**AN**A**T**A**Q**Q**I**Q**T**T**I  
 hPKHD1 480 **P**D**V**V**T**T**Y**L**R**E**K**H**Q**I**R**V**R**A**Q**R**L**P**E**V**Q**V**L**N**V**S**G**R**G**N**F**FL**T**W**D**N**V**S**S**Q**P**T**P**AN**A**T**A**H**L**I**Q**T**T**I

mPkhd1 538 **E**ELL**V**K**C**N**L**A**F**FS**A**R**V**LL**R**L**G**F**E**Q**S**LE**G**S**R**SD**G**V**L**T**S**S**T**E**P**FC**G**R**F**GL**Q**L**G**H**L**I**L**I**P**E  
 hPKHD1 540 **E**ELL**V**K**C**K**L**E**L**W**S**N**L**LL**R**L**G**F**E**R**E**P**E**V**S**N**S**D**G**L**T**S**G**T**E**P**F**C**G**R**E**SL**R**Q**P**R**H**L**V**L**T**P**P**

mPkhd1 598 **A**AD**K**G**Y**Q**P**DR**Y**P**Y**L**C**L**A**Y**R**G**H**M**N**K**T**L**D**MT**V**S**F**L**F**GF**Q**N**I**M**K**N**I**T**C**D**W**SL**T**N**P**H**P**ES**W**Q**F**T  
 hPKHD1 600 **A**A**Q**K**G**Y**R**L**D**Q**Y**T**H**L**C**L**A**Y**K**G**H**M**N**K**T**L**K**M**I**V**S**E**T**I**G**F**Q**N**M**V**K**N**T**T**C**D**W**SL**T**R**T**S**P**ES**W**Q**F**D

mPkhd1 658 **Q**IN**L**W**T**C**L**CH**S**ED**L**Q**S**SL**A**N**T**P**L**L**V**H**R**ID**I**R**P**V**V**PE**A**GL**I**Y**V**DE**I**I**L**AD**T**N**V**T**S**Q**A**D**S**  
 hPKHD1 660 **Q**T**D**L**W**T**C**V**R**CF**G**DL**Q**PP**P**AN**S**P**V**L**V**H**Q**I**N**L**L**P**L**AC**Q**ET**G**L**F**Y**V**DE**I**I**L**AD**T**N**V**T**S**Q**A**D**S**

mPkhd1 718 **G**RAC**P**GG**N**V**E**S**V**S**V**GV**V**PP**V**Y**S**IS**W**LAG**C**G**S**EL**P**L**I**T**A**C**S**V**S**TE**G**T**G**D**G**S**E**L**I**E**V**T**A**Q  
 hPKHD1 720 **G**TAR**P**GG**N**L**V**E**S**V**S**V**V**GS**P**PP**V**Y**S**V**T**SW**L**AG**C**G**T**E**L**P**L**I**T**A**R**SV**P**TE**G**TE**G**S**G**L**V**L**V**T**T**Q

mPkhd1 778 **R**L**Q**RT**S**P**P**L**G**G**H**F**F**LY**L**SD**T**V**I**T**D**V**P**V**R**MS**A**R**Q**L**H**R**L**L**O**D**S**AD**E**ST**S**G**Y**L**N**AG**D**F**T**V**T**ED  
 hPKHD1 780 **R**R**Q**RT**S**P**P**L**G**G**H**F**R**I**Q**L**P**N**T**V**I**SD**V**P**V**Q**I**SA**H**HL**H**Q**L**L**Q**NN**A**DD**F**T**S**R**Y**L**N**AS**D**F**T**V**K**ED

mPkhd1 838 **I**NS**C**Y**E**H**V**W**T**L**S**W**T**T**Q**T**G**DL**P**N**F**IR**V**SD**Q**N**L**T**G**V**N**E**T**V**T**A**R**V**V**Y**D**G**G**V**F**L**G**P**L**F**G**D**M**L**A**T  
 hPKHD1 840 **I**Y**T**C**Y**E**H**V**W**T**L**S**W**S**T**Q**T**G**D**L**P**N**F**IR**V**SD**E**N**L**T**G**V**N**PA**A**A**T**R**V**V**Y**D**G**G**V**F**L**G**P**L**F**G**D**M**L**A**T**

mPkhd1 898 **A**N**Q**Q**T**Q**V**AV**Q**V**N**D**I**P**A**Y**C**S**G**S**C**S**F**Q**Y**Q**Q**EST**P**S**V**D**H**V**W**Y**S**L**G**S**D**V**N**L**V**H**E**T**G**T**G**F**P**R**D**I  
 hPKHD1 900 **A**N**Q**H**T**Q**V**V**R**V**R**V**N**D**V**PA**H**CP**G**S**C**S**F**Q**Y**L**Q**G**S**T**F**CV**H**S**V**W**Y**S**L**D**G**D**I**N**L**M**I**Y**T**T**G**T**G**F**S**G**D**S

mPkhd1 958 **Q**F**L**Q**V**P**V**N**K**T**S**C**E**V**L**FS**N**E**T**N**V**AC**E**L**A**L**L**P**V**G**V**H**Q**L**F**M**L**V**I**PS**G**L**A**V**N**AS**G**E**D**L**L**H**V**EP  
 hPKHD1 960 **Q**F**L**Q**V**T**V**N**K**T**S**C**K**V**L**FS**N**Q**T**N**V**V**C**Q**T**D**L**L**P**V**G**M**H**R**L**L**M**L**V**R**P**S**G**L**A**IS**A**IG**E**D**L**F**L**N**V**KE

mPkhd1 1018 **R**L**D**AV**E**P**S**T**A**A**I**GG**R**W**T**L**R**G**S**S**L**E**G**V**S**L**L**F**G**T**Q**SC**V**T**D**A**I**R**S**N**S**Q**Q**I**Q**CK**V**P**P**R**G**K**V**  
 hPKHD1 1020 **R**L**D**M**V**E**P**S**R**A**A**I**G**G**L**W**A**T**L**R**G**S**S**L**E**G**V**S**L**L**F**G**S**Y**S**CA**I**N**V**A**T**S**N**S**R**I**Q**CK**V**P**P**R**G**K**D**

mPkhd1 1078 GYTVNVTVISGDHSTVILARAFTYVSSLNPVIVLSLRNRSSLAGGETLFLGMSLLVNYTDL  
 hPKHD1 1080 GRIVNVTVIRGDYSVLPRAFTYVSSLNPVIVTLNRNINSLAGGETLVIGVARLNNYTDL  
 mPkhd1 1138 DVQIHVQDTSACVLSQTAWGLEVLVPLVPCIHATSAFINGVSIHSQGVLDLYIQYLTEVF  
 hPKHD1 1140 DVEVHVQDALAFVHTQSAAWGLEVALPPLPAGLHRISVSIINGVSIHSQGVLDLHIQYLTEVF  
 mPkhd1 1198 SVEPCSGLLGGTLLNLLGTGLGRDPALIRVLDNHPCDIVDLTEVNIWCETPPAVLPPR  
 hPKHD1 1200 SLEPCGSLLGGTILSLISGICFSRDPALVWVLVGNRSCDIVNLTEASIWCE TLPAQIPD  
 mPkhd1 1258 ADVLTVFPASVEIWAGNTSFFHG--PSLVGKGFTTFYEAAATPVVTAMWGEFRNNSVRFYV  
 hPKHD1 1260 AGAPTVPAAVEVWAGNRFFARCPSPSLVGKFTTFYEAAATPVVTAMQGEITNSSLSLHV  
 mPkhd1 1316 EGSNLSDSVILLGSLKCELEVQFFGDSMNLFCGCFPLHSLEAGVYTLQVRHKRMGFANMS  
 hPKHD1 1320 GGSNLSNSVILLGNLNCDFEFCFSFQGNVSLGCSIPHSLEAGIYPLQVRKQMGFANMS  
 mPkhd1 1376 VVPOKFEELSPQITIAIFPTHGSKCGGTVLTVMGMAFSSRKRSVHVDISGPFACMILSLEDH  
 hPKHD1 1380 VVLOQFAVMPRITMAIFPSQGSACGGTILTVRGLLLNSRRRSVRVDLSGPFACVILSISGDH  
 mPkhd1 1436 TVLCCQTRFVGDQFSEASLANITVVLVNGLTSKCKGNCTLFIEEAAIFNVDALTISISGSL  
 hPKHD1 1440 TILCCQVSLEGLPLPGASFSLNVTVLVNGLTSKCKGNCTLFIEEASFEVMDALSTNTSGSL  
 mPkhd1 1496 TMVLMRGRRLATTAEFIAFVHDQLPCHTTFNTHSHVACQTRDLAPGFHYLSAVHTSAGY  
 hPKHD1 1500 TTVLRGRQLATTAEFPMVFDQLPCHTTFNTHSHVACQTRDLAPGPHYLSVVFYTRNGY  
 mPkhd1 1556 ACLNSVSRNFTIVPQVLDYFPKDFSLHGGSLLTIKGTALRGWKAIVVYVGRQACLTVNFS  
 hPKHD1 1560 ACGSNVSRHFVIMPQVFHYFPKNFSLHGGSLLTIEGTGLRGQNTTSVYIDQCTCLTVNIG  
 mPkhd1 1616 SDFIQCIVPAGNGSAALEIDVDGVLVHIGLVYSSIFTPPELLSVSRSQDILTFTVARISG  
 hPKHD1 1620 AGLIRCIVPTGNGSVALEIEVDGLVHIGLVYGNKAFTPPELLSISQSDILTFAVAQISG  
 mPkhd1 1676 AANVDIFIGTSPCLGVACNRTVLQCMVPLLPAGEYLVITGYDHSRGWASSTLILVLRATVIT  
 hPKHD1 1680 AANIDIFIGTSPCVGVSGNHTVLQCVVPSLPAGEYHVRGYDCIRGWASSALVFTSRVITIT  
 mPkhd1 1736 SVTKNYGCLGRLLVHVLGAGFSPGNISAAVCGAPCQVLANATVSFAFSCVLVPLDVSLAFL  
 hPKHD1 1740 AVTENFGCLGRLLVHVLGAGFSPGNISAAVCGAPCQVLANATVSFAFSCVLVPLDVSLAFL  
 mPkhd1 1796 QDLRHAEDSCKVRSSTYLQCDLTVSMGTERLPGSWPYVYLCEESSCLFVDPDHWAESVFP  
 hPKHD1 1800 QGLKRBEDSCEAARHTYVQCDLTVAMATEQLLESWPYLYICEESSCLFVDPDHWAESMFP  
 mPkhd1 1856 SFSGLFISPKVERDEVLIYNSSCNITMETEAEMECEMPNQPIITAKITEIQKNWGQNTQGN  
 hPKHD1 1860 SFSGLFISPKLERDEVLIYNSSCNITMETEAEMECEMPNQPIITVKITAIRKRWGQNTQGN  
 mPkhd1 1916 FSFQFCRRWSRPHSWFPQRVPHDGDVTVETICHLLLLDANTSFLNSLHIKGGKLI FMDPG  
 hPKHD1 1920 FSLQFCRRWSRTHSWFFERLPQDGDNVTVENQOLLLLDINTSILNLSLHIKGGKLI FMAPG  
 mPkhd1 1976 PIELRAHSILITDGGELHIGSEKPFQGRARTKIYGSVHSTPFFPYGVKFLAVRNGTLSL  
 hPKHD1 1980 PIELRAHAAILVSDGGELRIGSEDKPFQGRARTIYGSVHSTPFFPYGVKFLAVRNGTLSL  
 mPkhd1 2036 HGSVPEVTVTYLQAAAHAGDKVLTLEAVDWKPGDEAVITSGMTVACA-EATEVTVVETV  
 hPKHD1 2040 HGSLPEVIVTCLRATAHALDITVLALEDAVDWNPGEVVIISGTGVKAKPMEEIVTVETV  
 mPkhd1 2095 HNADLHLRNPLRYSYDFRENWVAGENPILKPSVALLSRNIIIQGNFTLERVKLLNSCQEA

hPKHD1 2100 QDTDLVYKSPLYRSHNFTENWVAGEHHILKATVALLSRSTIIOGNLTNERPKLLVSCQEA

mPkhd1 2155 NTAKGNLKHCLYSKSEKMLGARDIGARVIIQSFPEEPSFVRLKGVQFRDLGQAFHKHLSS  
hPKHD1 2160 NAPEGNLQHCCLYSMSEKMLGSRDMGARVIQSFPEEPSQVQLKGVQFQVQLGQAFHKHLSS

mPkhd1 2215 IALVGMARGSVIQSCSVWNSFSRGLSMHRTWGLKVDSNVFYKIVGHALLGLPTWTEGLA  
hPKHD1 2220 IALVGMARRESFIQGCIVRNSFSRGLSMCGTLGLKVDSNVFYNIILGHALLVCTCTEMR-YI

mPkhd1 2275 LVRLILEEKNGWEOQSTIRNNVITISVSAEGLSGSEMLAPAGIYTFSPNTVMMEGNRVCA  
hPKHD1 2279 SWEALHGRKDDWSGHENIIRNNVITQVSCAEGLSNPEMLTPESGIYICSPNTVIEGNRVCC

mPkhd1 2335 AGYGYVFHLVTSQTLQAPLLSFNWNIAHSCTRYGLLVYPKFQPPWNNDTGFTLFQNFMVW  
hPKHD1 2339 AGYGYVFHLMTNQTSQAPLLSFQNIHSCTRYGLLVYPKFQPPWNNVTGFTLFQSFETVW

mPkhd1 2395 GSAGGAQIFRSNNLHLKNFQVYACRDFGIDILESDENTLITDSFLLGHFTHKGSLCMSAG  
hPKHD1 2399 ESAGGAQIFRSNNLHLKNFKVYSCRDFGIDVLESDEANTSVTDSLILLGHFTHKGSLCMSSSG

mPkhd1 2455 IKTPQRWELTISNNTTFVNFDD-NCVAIRTCSCCFQGGGTVKTRQLKFTNSSNLVAFPP  
hPKHD1 2459 IKTPQRWELMVSNNTTFVNFDLINCVAIRTCSDCSQGGGTVKTSQLKFTNSSNLVAFPP

mPkhd1 2514 PHAAVLEDLDGSLSGKNGSHVLASMETLSDIICLTNASFSQIVPGSVCGEAVLFHRMSIAL  
hPKHD1 2519 PHAAVLEDLDGSLSGKNRSHLILASMETLSASCLVNSFGRVYVHGSACGGVLFHRMSIGL

mPkhd1 2574 ANSLDVPKNLTTTDDICNKTITVNYVEDTLSNYYGWMALLLDQETYSLOQFESFWMNRSLOQ  
hPKHD1 2579 ANTPVYSYDLTMTDSRNKTITVNYVEDTLSNPRGWMALLLDQETYSLOQENLWINRSLOQ

mPkhd1 2634 SATFDSFAPGNVLLIMHRDLPPYPDILLRCGSQVGHSLPFFHELPSQDRACDWFNRLQRLQ  
hPKHD1 2639 SATFDNFAPGNVLLLVHTDLPPYPDILLRCGSRVGLSFPTESEPGNQCCDWFNRSQRLQ

mPkhd1 2694 LTYLVS GEGQVKVFLQIKKPGVPPSVSASTSVPEASLKWSLPETWQDVEKGWGGYNNHTIPG  
hPKHD1 2699 LTYLVS GEGQVQVILRVKKEGMPPTISASTSAPESALKWSLPETWQDVEEKGWGGYNNHTIPG

mPkhd1 2754 PGDDVLILPNKTVLVDTDLFVLRCLYVMGTLEFPVDRSNVLSVACLLIAGGELKVGTLN  
hPKHD1 2759 PGDDVLILPNKTVLVDTDLFFKGLYVMGTLEFPVDRSNVLSVACMVIAGGELKVGTLN

mPkhd1 2814 PLEKQORLLIILLRASEEVVCDYFEGIHVDPGTIGVYKLRILHSAYPKKSWVHLGADIAPG  
hPKHD1 2819 PLEKQORLLIILLRASEGVFCDRMNGIHDPGTIGVYKVLHLYSAYPKNSWVHLGADIASG

mPkhd1 2874 NERIIVHNAVVDWQPHDTIVLSSSSYBAHEAEVLTVKEVKGHHIRIYERLKRHRIGSTHIM  
hPKHD1 2879 NERIIVEDAVDWRPHDKIVLSSSSYBHEAEVLTVKEVKGHHVRIYERLKRHRIGSVHVT

mPkhd1 2934 EDGQQIHLAAEVGLLTRNIQIQPDSVSCRGRILVGSFRKSSCEDFSGVLQLLNVEIQNMGL  
hPKHD1 2939 EDGRHILHLAAEVGLLTRNIQIQPDVSCRGRILVGSFRKSSREDFSGVLQLLNVEIQNFGS

mPkhd1 2994 PLYSSIEFTGVSAGSWVISSTVHQSCSVGIHASSSHGVILLDNVVFGTNGHGIDVEGQNY  
hPKHD1 2999 PLYSSIEFVSAGSWVISSTVHQSCGGGIHAAASHGVILLDNVVFGTAGHGIDLEGQAY

mPkhd1 3054 SITNNLVILTMQSANSSPWVAGIKVNYAEDIILHGNVVAGSERLGFHVGHGCS-SEVLW  
hPKHD1 3059 TVTNNLVVILMTQPAWSTIIVVAGIKVNVQVKDINLHGNVVAGSERLGFHIRGHKCSSCELLW

mPkhd1 3113 SDNVVHSSLHGLHLYKHESENCTGVSGFLAFKNFDYGAMVQTENSVDIQNITLVDNTVG  
hPKHD1 3119 SDNVVHSSLHGLHLYKESGLDNCTREISGFLAFKNFDYGAMVHVENSVEIENITLVDNTIG

mPkhd1 3173 LLAIIVYVSSALLSSVSTVQITLRLNSVIVATSSSFDCIHDRKAPCSANWTSTDRAPSNPRG  
 hPKHD1 3179 LLAVYVVFSA PQNSVKKVQIVLRLNSVIVATSSSFDCIQDKVKKPHSANLTS'DRAPSNPRG

mPkhd1 3233 GRIGILWPVSASEPNAWPQEPWHKVRSHHSVFGIMKLQDVFSSFFVKSCYSNDLDVCILP  
 hPKHD1 3239 GRIGILWPVFTSEPNAWPQEPWHKVRNDHSVFGIMKLQDVFSSFFVKSCYSNDLDVCILP

mPkhd1 3293 NEYSTGVMYPITAERTRLGKDKNKFYFPVLOSSKDLVGTICPTLVCEYPRKYLETDLD  
 hPKHD1 3299 NAENSGTMMHPITAERTRLKDKDKNKFYFBSLQPRKDLGKVVCPETLDCASPRKYLEKDL

mPkhd1 3353 CRTLGLPPPVSVPFRTEEWTCSEFLMTCIFREEQKCTFRANNOGFTCKQTEHAVLILDNV  
 hPKHD1 3359 GRALGLPPPVSVPFRTEAEWTCSEFLMTCIFREEQKCTYQFTMGGFTCKQTEQVVLILDSA

mPkhd1 3413 DATWTIPKSHPIVSVTNGFVDTFSSIVKDSDLCPPTSSLSSTFYSSILETRQMTKVCFFEQTP  
 hPKHD1 3419 DAIWAIQKLYPVVSVTSGFVDVFSSVNNANIFCSTSGSVSTFYSSILETRQMTKVCFFMDQTP

mPkhd1 3473 PFLRFLLGNQRASKLILAVFYNEIQSPHVFLDKSFIPPTSLIESAFSLLAXPFGANYFDI  
 hPKHD1 3479 QVLRFLLLGNKSTSKLILAVFYHEIQSPHVFLGESFIPPTLVQASILLNLSIGANYFNI

mPkhd1 3533 MNLLYVVLQGEETVEIHSVSIHLALTVTFVLEKGERAMLESLSDFEQIDPNQIRLT  
 hPKHD1 3539 MDNLLYVVLQGEETVEIRS SVSIHLALTVMVSVLEKGEIVILERLINFLOIQONQIRFI

mPkhd1 3593 LEMPCKNETLEAIANSERKRRKNCPSVTCGGPSIRVQORRPLMAEMTSLKIPATITLET  
 hPKHD1 3599 HEMPCHETLEKAIADSRAKRRKNCPTVCTCTSHYRVRQORRPLMMENSHRASPPMTVETI

mPkhd1 3653 SKVIVIEVGDLENIRNSEPTIOSLPSNRLQRIVNOVITAQQTGALENVLGMTV GALLVTQS  
 hPKHD1 3659 SKVIVIEIGDSETVRSTGMTSSLSNKLQNL AHRVITAQQTGVLENVLNMTV GALLVTQS

mPkhd1 3713 KGVTYGRNASSLITGNLIYTRFSELSILVQPSDGEVGIELPVQPRLVFLDEKNERVESLG  
 hPKHD1 3719 KGVITYGNSTSSFKTGNLIYTRFYALSILVQPSDGEVGNELPVQPQLVFLDEQNRRVESLG

mPkhd1 3773 LPSEPWIIISVLEGASESVLKGCTLAETRDGYVTF SRLAVLISGSNWHLFFTVISPPGTN  
 hPKHD1 3779 LPSEPWIIISVLEGASESVLKGCTLAETRDGYVTF SRLAVLISGSNWHLFFTVISPPGVN

mPkhd1 3833 FTARSEITFVLPVASKERSTIILALSICSVASWVALSCLVCCWFKKSKTRKIKPEIISES  
 hPKHD1 3839 FTARSEITFAVLPVTRKSTIILAASSLSSVASWIALSCLVCCWFKKSKSRKIKPEIIPES

mPkhd1 3893 QAKEKKNTHMSSKPRGLQAKTAKENTLMGEDMRMKVMQGMQSOFHQHSMGVSRRKVS  
 hPKHD1 3899 QTNQNIHIHSSKRRRESQPKKEDTVVGEDMRMKVMLGKVNQCCHQLMNGVSRKVS

mPkhd1 3953 LAVTEERTTTPAPKIPIRIT-----CVPGSLAQQTLQEPGNWQEAQQOLLRYQLAGRNQL  
 hPKHD1 3958 HIVREBEAAVPAPGTTGITSHGHICAPGAPAQQVYLOETGNWKEEQEOLLRYOLAGQNQL

mPkhd1 4008 LLLRPDLRQERKQGEFSQLDKGSDCTGLSQEK-AICIPTEFTSLHTAPPETIQ---  
 hPKHD1 4018 LLLCDFRQERQQLPGOSRLSKOSGSLGLSQEKKASCGATBAFCLHSVHPETIQEQL
