# Supplementary material
Source: PubMed Central journal article supplement (PMC356947)

**A.**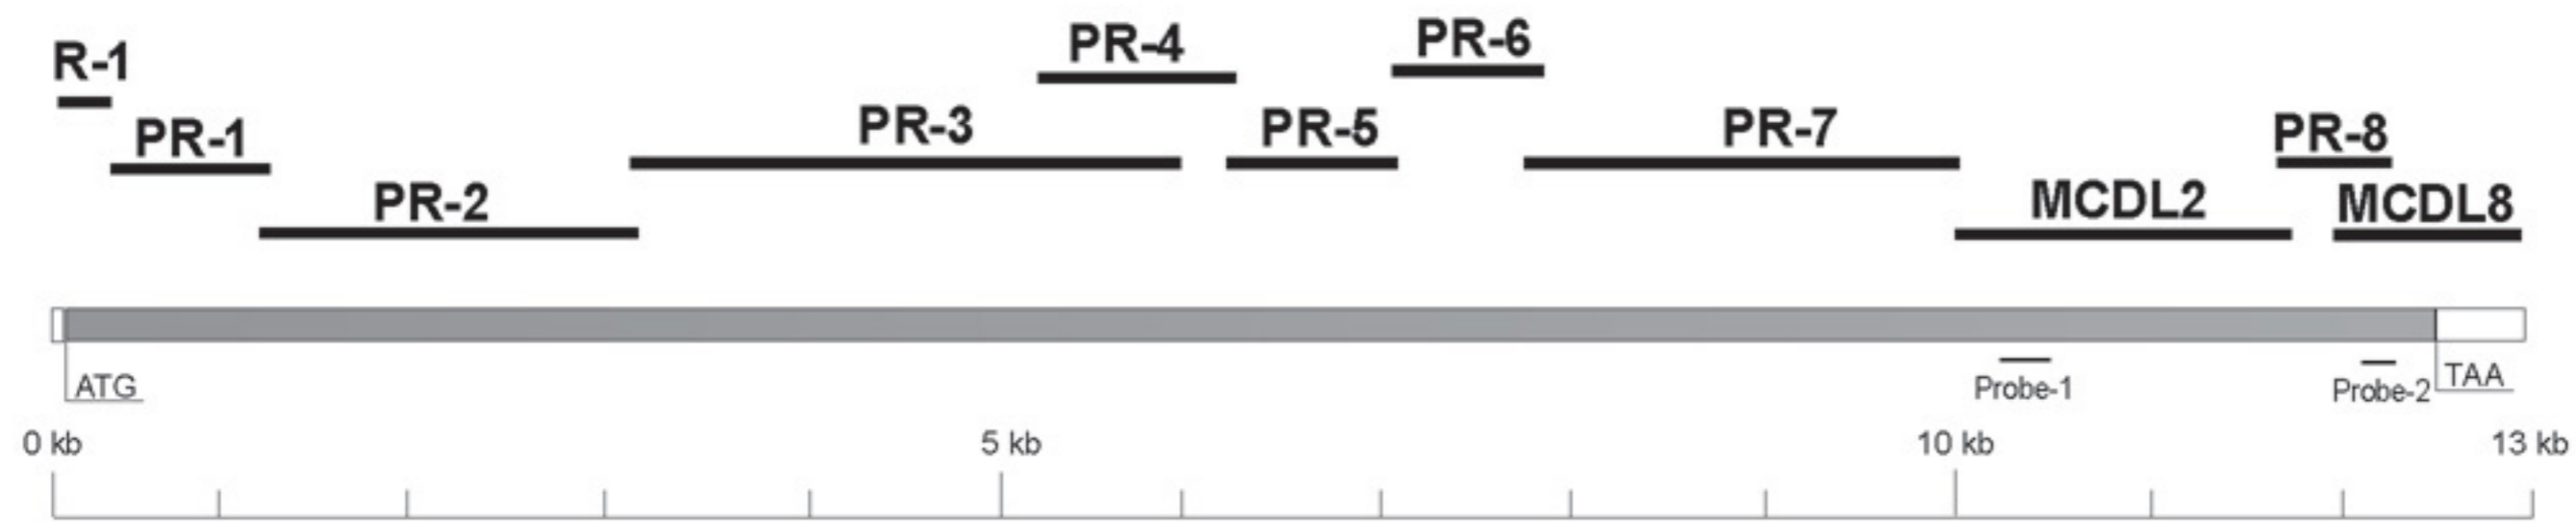**B.**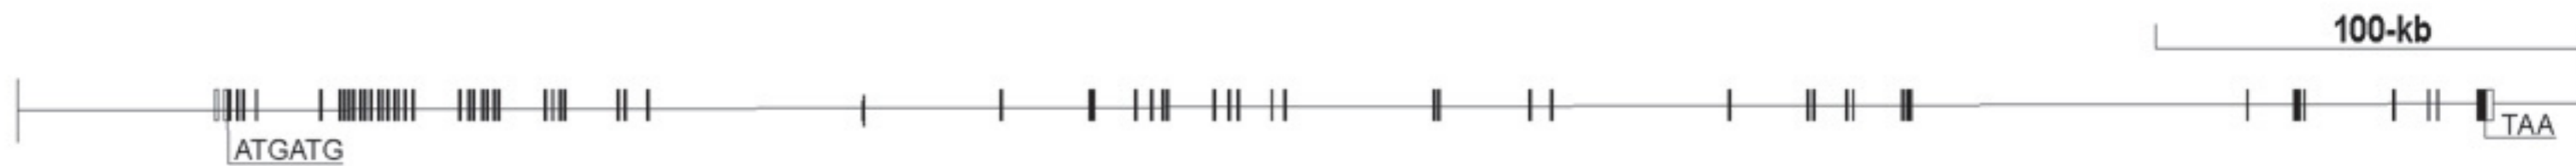**C.**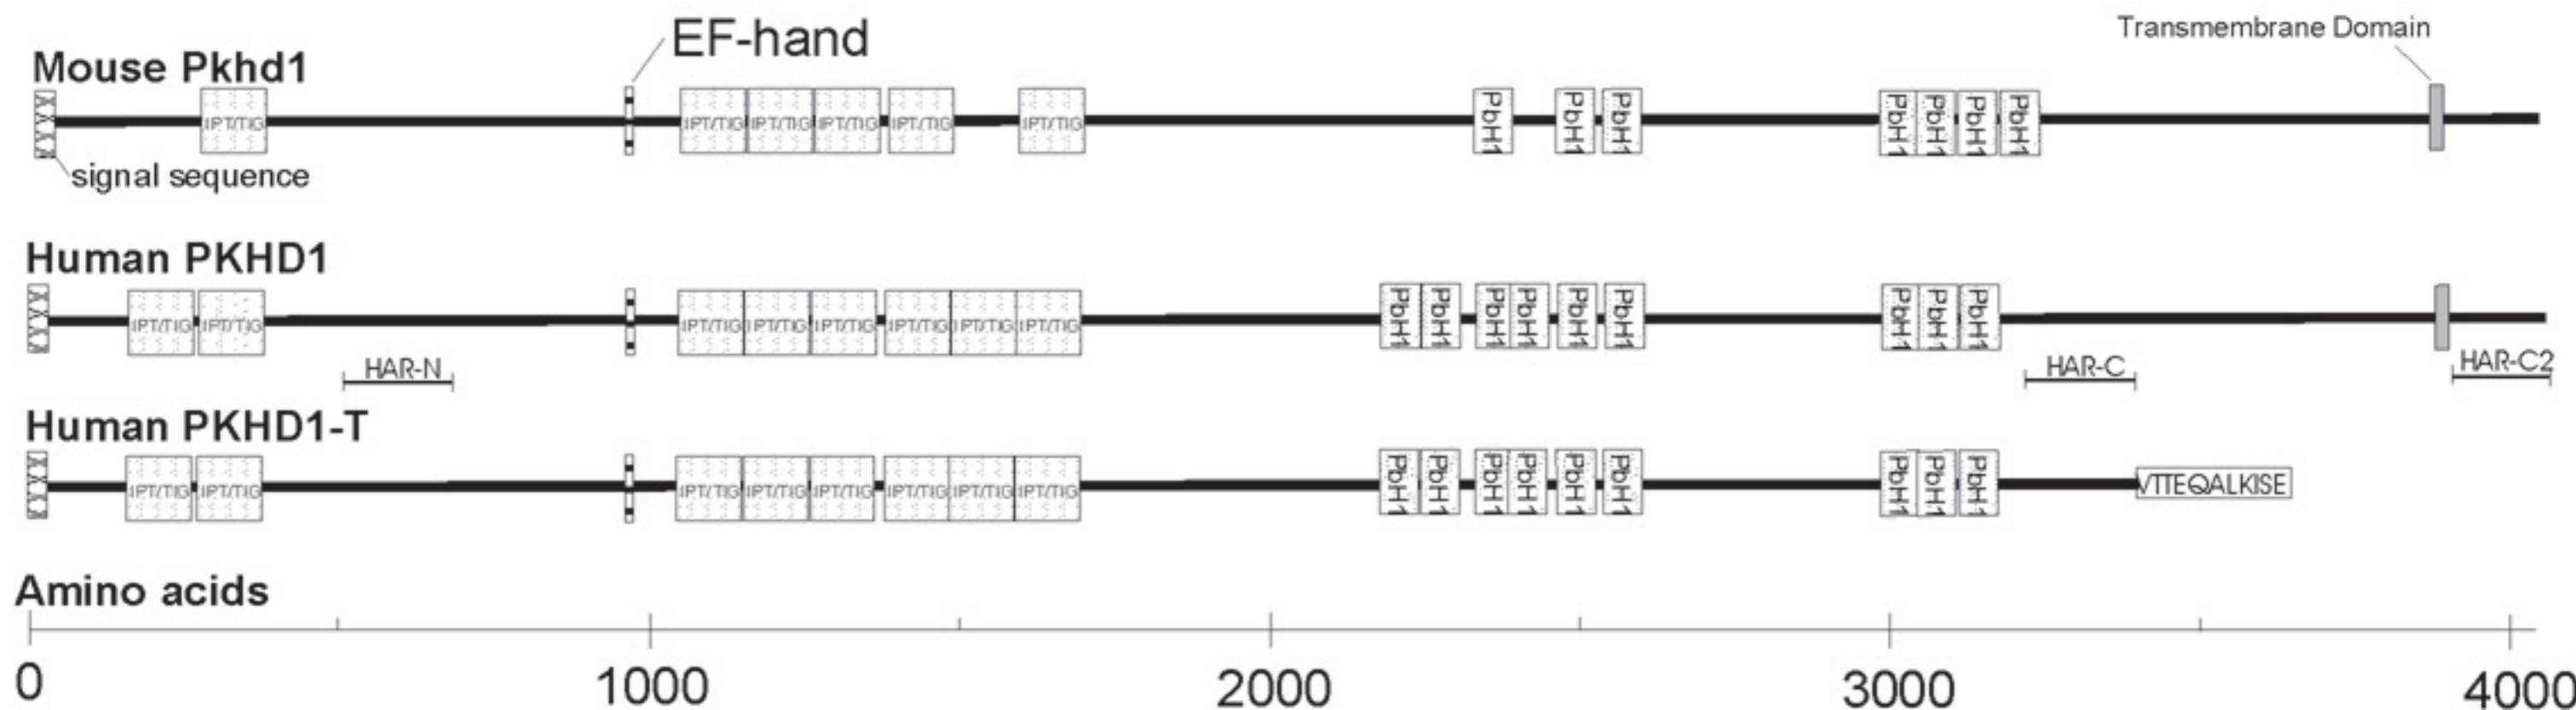

Supplement: pnas_0400073101_2.pdf [file pnas_0400073101_2.pdf]
